# Supplementary material for: Poor Adherence to the WHO Guidelines on Feeding Practices Increases the Risk for Respiratory Infections in Surinamese Preschool Children
Source: MDPI journal article supplement (doi:10.3390/ijerph182010739), 2021-10-13
Supplement: s1 [file s1]

## Supplementary materials

**Table S1: Modified versions WHO core IYCF indicators concerning complementary feeding practices [19,23]**

### Minimum dietary diversity (MDD)

Proportion of children aged 6–23 months, who received foods from at least four out of seven food groups the previous day.

The seven foods groups of this indicator were categorized as follows:

**Definition:**

1. grains, roots and tubers
2. legumes and nuts
3. dairy products (milk, yogurt, cheese)
4. flesh foods (meat, fish, poultry and liver/organ meats)
5. eggs
6. vitamin-A rich fruits and vegetables
7. other fruits and vegetables

Modification:

Group 6: Vitamin-A rich fruits and vegetables and group 7: non-vitamin-A rich fruits and vegetables, were combined in one food group. The MDD was considered achieved as per the WHO guidelines[24]

**Calculation:**

Children 6–23 months of age  
who received foods from  $\geq 4$  food groups during the previous day

Children 6–23 months of age

### Minimum meal frequency (MMF)

Proportion of breastfed and non-breastfed children 6–23 months of age who receive solid, semi-solid, or soft foods (including milk feeds for non-breastfed children) the minimum number of times or more the previous day.

Minimum is defined as:

- 3 times for breastfed children 9–23 months
- 4 times for non-breastfed children 6–23 months

**Definition:**

Modification:

Minimum is defined as:

- 4 times per day for breastfed children aged  $\geq 24$  months
- 5 times (three meals with two additional snacks) per day for non-breastfed children aged  $\geq 24$  months[25]

Remarks:

\*For breastfed children, this indicator assumes average breast milk intake. Therefore, the meal frequency indicator was calculated without including milk feeds.

**Calculation:**

Breastfed children 6–23 months of age who received solid, semi-solid or soft foods the minimum number of times or more during the previous day

Breastfed children 6–23 months of age

and

Non-breastfed children 6–23 months of age who received solid, semi-solid or soft foods the minimum number of times or more during the previous day

---

Non-breastfed children 6–23 months of age

---

**Minimum acceptable diet (MAD)**

---

Proportion of children 6–23 months of age who receive a minimum acceptable diet (apart from breast milk).

The MAD is a composite indicator of the MDD and MMF.

**Definition:**

Remarks:

To calculate this indicator for the non-breastfed children, milk feeds were excluded from the dietary diversity score to avoid double-counting.

- Breastfed children who met both the MDD and the MMF were considered to have achieved the required MAD.
- Non-breastfed children were considered to have achieved the required MAD if they received at least 2 milk feedings and met the MDD (excluding milk feeds) and the MMF during the previous day.

Modification:

Children aged  $\geq 24$  months achieved the MAD if MDD and MMF were met[24].

---

**Calculation:**

Breastfed children 6–23 months of age who had at least the MDD and MMF during the previous day

---

Breastfed children 6–23 months of age

and

Non-breastfed children 6–23 months of age who had at least 2 milk feedings and had at least the MDD not including milk feeds and the MMF during the previous day

---

Non-breastfed children 6–23 months of age

---

**Table S2:** Distribution of infant characteristics at year 1 follow-up

|                                               | Total          |                 | Children aged <24 months<br>(<730 days of age) |                 | Children aged ≥24 months<br>(≥730 days) |                 |         |
|-----------------------------------------------|----------------|-----------------|------------------------------------------------|-----------------|-----------------------------------------|-----------------|---------|
|                                               | N = 763 (100%) |                 | N= 640 (83.9%)                                 |                 | N= 123 (16.1%)                          |                 |         |
| <u>Infant characteristics</u>                 | N              | %               | N                                              | %               | N                                       | %               | p-value |
| <b>Gender</b>                                 |                |                 |                                                |                 |                                         |                 | .62     |
| Male                                          | 394            | 51.6            | 333                                            | 52              | 61                                      | 49.6            |         |
| Female                                        | 369            | 48.4            | 307                                            | 48              | 62                                      | 50.4            |         |
| Missing                                       |                |                 | 0                                              | 0.0             | 0                                       | 0.0             |         |
|                                               |                |                 |                                                |                 |                                         |                 |         |
| <b>Gestational age</b>                        |                |                 |                                                |                 |                                         |                 | 0.04*   |
| Moderately preterm<br>(33 + 0 - 36 + 6 weeks) | 28             | 3.7             | 19                                             | 3.0             | 9                                       | 7.3             |         |
| Term births (37 + 0 weeks)                    | 687            | 90              | 576                                            | 90.0            | 111                                     | 90.2            |         |
| Missing                                       | 48             | 6.3             | 45                                             | 7.0             | 3                                       | 2.4             |         |
|                                               |                |                 |                                                |                 |                                         |                 |         |
| <b>Currently breastfed</b>                    |                |                 |                                                |                 |                                         |                 | .13     |
| Yes                                           | 217            | 28.4            | 189                                            | 29.5            | 28                                      | 22.8            |         |
| No                                            | 546            | 71.6            | 451                                            | 70.5            | 95                                      | 77.2            |         |
| Missing                                       | 0              | 0.0             | 0                                              | 0.0             | 0                                       | 0.0             |         |
|                                               |                |                 |                                                |                 |                                         |                 |         |
| <b>Food allergy</b>                           |                |                 |                                                |                 |                                         |                 | 0.72    |
| Yes                                           | 36             | 4.7             | 31                                             | 4.8             | 5                                       | 4.1             |         |
| No                                            | 725            | 95              | 608                                            | 95.0            | 117                                     | 95.1            |         |
| Missing                                       | 2              | 0.3             | 1                                              | 0.2             | 1                                       | 0.8             |         |
|                                               |                |                 |                                                |                 |                                         |                 |         |
|                                               | <sup>1</sup> M | <sup>2</sup> SD | <sup>1</sup> M                                 | <sup>2</sup> SD | <sup>1</sup> M                          | <sup>2</sup> SD |         |
| <b>Age at first follow-up<br/>(months)</b>    | 18.13          | 4.81            | 16.41                                          | 2.80            | 27.06                                   | 2.67            | <.001*  |

**Table S3:** Distribution of maternal characteristics at year 1 follow-up

| Distribution of maternal characteristics | Total          |          | Children aged <24 months (<730 days) |       |  | ≥ Children aged 24 months (≥730 days) |       |                 |
|------------------------------------------|----------------|----------|--------------------------------------|-------|--|---------------------------------------|-------|-----------------|
|                                          | N = 763 (100%) |          | N= 640 (83.9%)                       |       |  | N = 123 (16.1%)                       |       |                 |
| <u>Maternal characteristics</u>          | <u>N</u>       | <u>%</u> | N                                    | %     |  | N                                     | %     | <i>p</i> -value |
| Maternal age at intake                   |                |          |                                      |       |  |                                       |       | 0.44            |
| 16–19 years                              | 84             | 11.0     | 67                                   | 10.5  |  | 17                                    | 13.8  |                 |
| 20–24 years                              | 172            | 22.5     | 149                                  | 23.3  |  | 23                                    | 18.7  |                 |
| 25–29 years                              | 213            | 27.9     | 180                                  | 28.1  |  | 33                                    | 26.8  |                 |
| 30–34 years                              | 181            | 23.7     | 150                                  | 23.4  |  | 31                                    | 25.2  |                 |
| 35–39 years                              | 87             | 11.4     | 75                                   | 11.7  |  | 12                                    | 9.8   |                 |
| 40+ years                                | 26             | 3.4      | 19                                   | 3.0   |  | 7                                     | 5.7   |                 |
| Missing                                  | 0              | 0.0      | 0                                    | 0.0   |  | 0                                     | 0.0   |                 |
|                                          |                |          |                                      |       |  |                                       |       |                 |
| Parity                                   |                |          |                                      |       |  |                                       |       | 0.11            |
| Primiparous                              | 254            | 33.3     | 205                                  | 32.0  |  | 49                                    | 39.8  |                 |
| Multiparous                              | 501            | 65.7     | 427                                  | 66.7  |  | 74                                    | 60.2  |                 |
| Missing                                  | 8              | 1.0      | 8                                    | 1.3   |  | 0                                     | 0     |                 |
|                                          |                |          |                                      |       |  |                                       |       |                 |
| Ethnicity                                |                |          |                                      |       |  |                                       |       | 0.27            |
| Creole                                   | 166            | 21.8     | 144                                  | 22.5  |  | 22                                    | 17.9  |                 |
| Hindustani                               | 175            | 22.9     | 142                                  | 22.2  |  | 33                                    | 26.8  |                 |
| Indigenous                               | 90             | 11.8     | 75                                   | 11.7  |  | 15                                    | 12.2  |                 |
| Javanese                                 | 70             | 9.2      | 61                                   | 9.5   |  | 9                                     | 7.3   |                 |
| Maroon                                   | 163            | 21.4     | 141                                  | 22.0  |  | 22                                    | 17.9  |                 |
| Mixed                                    | 92             | 12.1     | 71                                   | 11.1  |  | 21                                    | 17.1  |                 |
| Missing                                  | 7              | 0.9      | 6                                    | 0.9   |  | 1                                     | 0.8   |                 |
|                                          |                |          |                                      |       |  |                                       |       |                 |
| Marital status                           |                |          |                                      |       |  |                                       |       | 0.44            |
| Married or living with partner           | 667            | 87.4     | 557                                  | 87%   |  | 110                                   | 89.4% |                 |
| Not married/not living with partner      | 90             | 11.8     | 78                                   | 12.2% |  | 12                                    | 9.8%  |                 |
| Missing                                  | 6              | 0.8      | 5                                    | 0.8%  |  | 1                                     | 0.8%  |                 |
|                                          |                |          |                                      |       |  |                                       |       |                 |
| Educational level                        |                |          |                                      |       |  |                                       |       | 0.29            |
| No or primary level                      | 165            | 21.6     | 143                                  | 22.3  |  | 22                                    | 17.9  |                 |
| Lower vocational/secondary               | 241            | 31.6     | 200                                  | 31.3  |  | 41                                    | 33.3  |                 |
| Upper vocational/secondary               | 226            | 29.6     | 182                                  | 28.4  |  | 44                                    | 35.8  |                 |
| Tertiary                                 | 126            | 16.5     | 110                                  | 17.2  |  | 16                                    | 13.0  |                 |

|                                                                         |     |      |     |      |  |    |      |      |
|-------------------------------------------------------------------------|-----|------|-----|------|--|----|------|------|
| Missing                                                                 | 5   | 0.7  | 5   | 0.8  |  | 0  | 0.0  |      |
|                                                                         |     |      |     |      |  |    |      |      |
| <b>Household income SRD<sup>3</sup></b>                                 |     |      |     |      |  |    |      | 0.37 |
| <400                                                                    | 31  | 4.1  | 28  | 4.4  |  | 3  | 2.4  |      |
| 400–799                                                                 | 89  | 11.7 | 75  | 11.7 |  | 14 | 11.4 |      |
| 800–1499                                                                | 134 | 17.6 | 110 | 17.2 |  | 24 | 19.5 |      |
| 1500–2999                                                               | 223 | 29.2 | 185 | 28.9 |  | 38 | 30.9 |      |
| 3000–4999                                                               | 171 | 22.4 | 142 | 22.2 |  | 29 | 23.6 |      |
| 5000–9999                                                               | 64  | 8.4  | 49  | 7.7  |  | 15 | 12.2 |      |
| 10000–14999                                                             | 18  | 2.4  | 18  | 2.8  |  | 0  | 0.0  |      |
| 15000+                                                                  | 4   | 0.5  | 4   | 0.6  |  | 0  | 0.0  |      |
| Missing                                                                 | 29  | 3.8  | 29  | 4.5  |  | 0  | 0.0  |      |
|                                                                         |     |      |     |      |  |    |      |      |
| <b><u>Community factors:</u></b>                                        |     |      |     |      |  |    |      |      |
| <b>Place of residence</b>                                               |     |      |     |      |  |    |      | 0.39 |
| - Paramaribo, Wanica                                                    | 399 | 52.3 | 330 | 51.6 |  | 69 | 56.1 |      |
| - Commewijne, Saramacca,<br>Coronie, Nickerie, Para                     | 229 | 30.0 | 191 | 29.8 |  | 38 | 30.9 |      |
| - Tropical rainforest interior:<br>Marowijne, Brokopondo,<br>Sipaliwini | 131 | 17.2 | 115 | 18.0 |  | 16 | 13.0 |      |
| Missing                                                                 | 4   | 0.5  | 4   | 0.6  |  | 0  | 0.0  |      |
|                                                                         |     |      |     |      |  |    |      |      |
| <b><u>Access to health care</u></b>                                     |     |      |     |      |  |    |      |      |
| <b>First antenatal care visit</b>                                       |     |      |     |      |  |    |      | 0.48 |
| First trimester                                                         | 491 | 64.4 | 404 | 63.1 |  | 87 | 70.7 |      |
| Second trimester                                                        | 211 | 27.7 | 181 | 28.3 |  | 30 | 24.4 |      |
| Third trimester                                                         | 7   | 0.9  | 6   | 0.9  |  | 1  | 0.8  |      |
| Missing                                                                 | 54  | 7.1  | 49  | 7.7  |  | 5  | 4.1  |      |
|                                                                         |     |      |     |      |  |    |      |      |
| <b>Health Insurance</b>                                                 |     |      |     |      |  |    |      | 0.13 |
| Insured                                                                 | 498 | 65.3 | 401 | 62.7 |  | 97 | 78.9 |      |
| Not insured                                                             | 37  | 4.8  | 26  | 4.1  |  | 11 | 8.9  |      |
| Missing                                                                 | 228 | 29.9 | 213 | 33.3 |  | 15 | 12.2 |      |
|                                                                         |     |      |     |      |  |    |      |      |

<sup>1,2</sup>Data are presented as mean (M) with standard deviation (SD) or N %

<sup>3</sup>Srd = Surinamese dollar, equivalent to 0.07 USD

\* statistically significant
